# Supplementary material for: Hypothesis and Theory: Characterizing Abnormalities of Energy Metabolism Using a Cellular Platform as a Personalized Medicine Approach for Alzheimer’s Disease
Source: PubMed Central journal article supplement (PMC8363296; doi:10.3389/fcell.2021.697578), 2021-07-30
Supplement: Data_Sheet_1.pdf [file Data_Sheet_1.pdf]

# Hypothesis and Theory: Characterizing Abnormalities of Energy Metabolism Using a Cellular Platform as a Personalized Medicine Approach for Alzheimer's Disease

Woo-In Ryu<sup>1,2,3</sup>, Bruce M. Cohen<sup>1,3,4\*</sup>, and Kai-C. Sonntag<sup>1,2,3\*</sup>

<sup>1</sup>Department of Psychiatry, McLean Hospital, Harvard Medical School, Belmont, MA 02478, USA.

<sup>2</sup>Basic Neuroscience Division, McLean Hospital, Harvard Medical School, Belmont, MA 02478, USA

<sup>3</sup>Program for Neuropsychiatric Research, McLean Hospital, Harvard Medical School, Belmont, MA 02478, USA.

<sup>4</sup>Psychotic Disorders Division, McLean Hospital, Harvard Medical School, Belmont, MA 02478, USA.

**\* Correspondence:**

Kai-C. Sonntag ([ksontag@mclean.harvard.edu](mailto:ksontag@mclean.harvard.edu)) or Bruce M. Cohen ([bcohen@mclean.harvard.edu](mailto:bcohen@mclean.harvard.edu))

**Keywords: Alzheimer's Disease<sup>1</sup>, Bioenergetics<sup>2</sup>, Metabolism<sup>3</sup>, Pluripotent Stem Cells<sup>4</sup>, Cellular Platforms<sup>5</sup>, Disease Modeling<sup>6</sup>, Personalized Medicine<sup>7</sup>**

**Supplementary Tables and Figures**

| sample ID | sample ID iPSC | Age | Sex | Race     | Diagnosis | APOE | Donor Cell iPSC   | Cell Type | Genotype       | iPSC Characterization       | iPSC Source | Reprogramming iPSC | Cell Types Analyzed          | HIS | MOCA | MMSE* | Comorbidity                                           | Reference                              |
|-----------|----------------|-----|-----|----------|-----------|------|-------------------|-----------|----------------|-----------------------------|-------------|--------------------|------------------------------|-----|------|-------|-------------------------------------------------------|----------------------------------------|
| 367       |                | 21  | M   | white    | CrI       | E33  | Dermal Fibroblast |           | normal, male   | Yoshimizu 2015; McPhee 2018 | NYSCF       | RNA transfection   | Fibroblasts                  |     |      |       | No serious illness                                    | Sonntag et al., 2017                   |
| 368       | C1             | 21  | M   | SE asian | CrI       | E22  | Dermal Fibroblast |           | normal, male   | Yoshimizu 2015; McPhee 2018 | NYSCF       | RNA transfection   | Fibroblasts, NPC, astrocytes |     |      |       | No serious illness                                    | Ryu et al., 2021                       |
| 284       |                | 23  | M   | white    | CrI       | E22  | Dermal Fibroblast |           |                |                             |             |                    | Fibroblasts                  |     |      |       | No serious illness                                    | Sonntag et al., 2017                   |
| 285       |                | 23  | M   | white    | CrI       | E22  | Dermal Fibroblast |           |                |                             |             |                    | Fibroblasts                  |     |      |       | No serious illness                                    | Sonntag et al., 2017                   |
| 488       |                | 28  | M   | white    | CrI       | E23  | Dermal Fibroblast |           |                |                             |             |                    | Fibroblasts                  |     |      |       | No serious illness                                    | Sonntag et al., 2017                   |
| 359       |                | 31  | M   | black    | CrI       | E34  | Dermal Fibroblast |           |                |                             |             |                    | Fibroblasts                  |     |      |       | No serious illness                                    | Sonntag et al., 2017                   |
| 369       |                | 33  | M   | black    | CrI       | E23  | Dermal Fibroblast |           |                |                             |             |                    | Fibroblasts                  |     |      |       | No serious illness                                    | Sonntag et al., 2017                   |
| 365       |                | 35  | M   | white    | CrI       | E33  | Dermal Fibroblast |           |                |                             |             |                    | Fibroblasts                  |     |      |       | No serious illness                                    | Sonntag et al., 2017                   |
| 152       | C2             | 37  | M   | white    | CrI       | E33  | Dermal Fibroblast |           | normal, male   | Yoshimizu 2015; McPhee 2018 | Tsai Lab    | RNA transfection   | Fibroblasts, NPC, astrocytes |     |      |       | No serious illness                                    | Ryu et al., 2021                       |
| 190       |                | 40  | M   | black    | CrI       | E33  | Dermal Fibroblast |           |                |                             |             |                    | Fibroblasts                  |     |      |       | No serious illness                                    | Sonntag et al., 2017                   |
| 485       |                | 44  | M   | white    | CrI       | E33  | Dermal Fibroblast |           |                |                             |             |                    | Fibroblasts                  |     |      |       | No serious illness                                    | Sonntag et al., 2017                   |
| 486       |                | 44  | M   | white    | CrI       | E33  | Dermal Fibroblast |           |                |                             |             |                    | Fibroblasts                  |     |      |       | No serious illness                                    | Sonntag et al., 2017                   |
| 487       |                | 45  | M   | white    | CrI       | E33  | Dermal Fibroblast |           |                |                             |             |                    | Fibroblasts                  |     |      |       | No serious illness                                    | Sonntag et al., 2017                   |
| 488       |                | 46  | M   | white    | CrI       | E33  | Dermal Fibroblast |           |                |                             |             |                    | Fibroblasts                  |     |      |       | No serious illness                                    | Sonntag et al., 2017                   |
| 365       |                | 52  | M   | white    | CrI       | E33  | Dermal Fibroblast |           |                |                             |             |                    | Fibroblasts                  |     |      |       | No serious illness                                    | Sonntag et al., 2017                   |
| 316       |                | 54  | M   | white    | CrI       | E33  | Dermal Fibroblast |           |                |                             |             |                    | Fibroblasts                  |     |      |       | No serious illness                                    | Sonntag et al., 2017                   |
| 14        |                | 55  | M   | white    | CrI       | E33  | Dermal Fibroblast |           |                |                             |             |                    | Fibroblasts                  |     |      |       | No serious illness                                    | Sonntag et al., 2017                   |
| 342       | C3             | 57  | M   | white    | CrI       | E34  | Dermal Fibroblast |           | normal, male   | Ryu et al., 2021            | UNC         | Senda virus        | Fibroblasts, NPC, astrocytes |     |      |       | No serious illness                                    | Sonntag et al., 2017; Ryu et al., 2021 |
| 44        | C6             | 59  | M   | white    | CrI       | E33  | Dermal Fibroblast |           |                |                             | UNC         | Senda virus        | Fibroblasts, NPC, astrocytes |     |      |       | No serious illness                                    | Ryu et al., 2021                       |
| 489       | C4             | 60  | F   | white    | CrI       | E33  | Dermal Fibroblast |           | normal, female | Ryu et al., 2021            | UNC         | Senda virus        | Fibroblasts, NPC, astrocytes |     |      |       | No serious illness                                    | Sonntag et al., 2017; Ryu et al., 2021 |
| 491       | C5             | 61  | M   | white    | CrI       | E34  | Dermal Fibroblast |           | normal, male   | Ryu et al., 2021            | UNC         | Senda virus        | Fibroblasts, NPC, astrocytes |     |      |       | No serious illness                                    | Sonntag et al., 2017; Ryu et al., 2021 |
| 497       |                | 61  | F   | white    | CrI       | E33  | Dermal Fibroblast |           |                |                             |             |                    | Fibroblasts                  |     |      |       | No serious illness                                    | Sonntag et al., 2017                   |
| 498       |                | 61  | F   | white    | CrI       | E33  | Dermal Fibroblast |           |                |                             |             |                    | Fibroblasts                  |     |      |       | No serious illness                                    | Sonntag et al., 2017                   |
| 357       |                | 65  | M   | white    | CrI       | E33  | Dermal Fibroblast |           |                |                             |             |                    | Fibroblasts                  |     |      |       | No serious illness                                    | Sonntag et al., 2017                   |
| 47        |                | 65  | F   | white    | CrI       | E33  | Dermal Fibroblast |           |                |                             |             |                    | Fibroblasts                  |     |      |       | No serious illness                                    | Sonntag et al., 2017                   |
| 569       |                | 66  | M   | white    | CrI       | E33  | Dermal Fibroblast |           |                |                             |             |                    | Fibroblasts                  |     |      |       | No serious illness                                    | Sonntag et al., 2017                   |
| 205       | C7             | 67  | M   | white    | CrI       | E34  | Dermal Fibroblast |           |                |                             | UNC         | Senda virus        | Fibroblasts, NPC, astrocytes |     |      |       | No serious illness                                    | Ryu et al., 2017                       |
| 140       |                | 72  | M   | white    | CrI       | E33  | Dermal Fibroblast |           |                |                             | UNC         | Senda virus        | Fibroblasts, NPC, astrocytes |     |      |       | No serious illness                                    | Sonntag et al., 2017                   |
| 405       | C8             | 75  | F   | white    | CrI       | E33  | Dermal Fibroblast |           |                |                             | UNC         | Senda virus        | Fibroblasts, NPC, astrocytes |     |      |       | No serious illness                                    | Sonntag et al., 2017                   |
| 169       | C9             | 82  | M   | white    | CrI       | E33  | Dermal Fibroblast |           |                |                             | UNC         | Senda virus        | Fibroblasts, NPC, astrocytes |     |      |       | No serious illness                                    | Sonntag et al., 2017                   |
| 563       |                | 88  | M   | white    | CrI       | E33  | Dermal Fibroblast |           |                |                             |             |                    | Fibroblasts                  |     |      |       | No serious illness                                    | Sonntag et al., 2017                   |
| 330       | AD1            | 56  | M   | white    | AD        | E33  | Dermal Fibroblast |           | normal, male   | Ryu et al., 2021            | Tsai Lab    | Senda virus        | Fibroblasts, NPC, astrocytes | 0   | 24   |       | No serious illness                                    | Sonntag et al., 2017; Ryu et al., 2021 |
| 374       |                | 59  | F   | white    | AD        | E34  | Dermal Fibroblast |           |                |                             |             |                    | Fibroblasts                  | 1   | 14   |       | No serious illness                                    | Sonntag et al., 2017                   |
| 580       |                | 63  | M   | white    | AD        | E33  | Dermal Fibroblast |           |                |                             |             |                    | Fibroblasts                  | NA  | NA   | 6     | Diabetes II                                           | Sonntag et al., 2017                   |
| 572       |                | 64  | F   | white    | AD        | E34  | Dermal Fibroblast |           |                |                             |             |                    | Fibroblasts                  | 2   | 6    |       | No serious illness                                    | Sonntag et al., 2017; Ryu et al., 2021 |
| 231       | AD2            | 65  | M   | white    | AD        | E34  | Dermal Fibroblast |           | normal, male   | Ryu et al., 2021            | Tsai Lab    | Senda virus        | Fibroblasts, NPC, astrocytes | NA  | NA   |       | Glaucoma, hypertension, CAD, cerebrovascular accident | Sonntag et al., 2017; Ryu et al., 2021 |
| 402       |                | 70  | M   | white    | AD        | E44  | Dermal Fibroblast |           |                |                             |             |                    | Fibroblasts                  | NA  | NA   |       | No serious illness                                    | Sonntag et al., 2017                   |
| 399       | AD3            | 71  | F   | white    | AD        | E34  | Dermal Fibroblast |           | normal, female | Ryu et al., 2021            | Tsai Lab    | Senda virus        | Fibroblasts                  | 2   | 18   |       | Not recorded                                          | Sonntag et al., 2017                   |
| BC2       | AD7            | 71  | M   | white    | AD        | E34  | Dermal Fibroblast |           |                |                             | UNC         | Senda virus        | Fibroblasts, NPC, astrocytes | 2   | 10   |       | No serious illness                                    | Sonntag et al., 2017; Ryu et al., 2021 |
| 389       |                | 76  | M   | white    | AD        | E34  | Dermal Fibroblast |           |                |                             |             |                    | Fibroblasts                  | 0   | NA   | 23    | No serious illness                                    | Ryu et al., 2021                       |
| 389       |                | 76  | M   | white    | AD        | E34  | Dermal Fibroblast |           |                |                             |             |                    | Fibroblasts                  | 3   | NA   |       | No serious illness                                    | Ryu et al., 2021                       |
| 281       | AD5            | 78  | M   | white    | AD        | E44  | Dermal Fibroblast |           | normal, male   | Ryu et al., 2021            | Tsai Lab    | Senda virus        | Fibroblasts, NPC, astrocytes | 4   | 13   |       | Hypertension                                          | Sonntag et al., 2017; Ryu et al., 2021 |
| 404       | AD6            | 81  | M   | white    | AD        | E34  | Dermal Fibroblast |           | normal, male   | Ryu et al., 2021            | Tsai Lab    | Senda virus        | Fibroblasts, NPC, astrocytes | 4   | 18   |       | Diabetes II, hypertension, hypotension, CAD           | Sonntag et al., 2017; Ryu et al., 2021 |
| BC3       | AD8            | 78  | F   | white    | AD        | E34  | Dermal Fibroblast |           | normal, female | Ryu et al., 2021            | Tsai Lab    | Senda virus        | Fibroblasts, NPC, astrocytes | 1   | 5    |       | No serious illness                                    | Sonntag et al., 2017; Ryu et al., 2021 |
| 332       | AD9            | 82  | F   | white    | AD        | E33  | Dermal Fibroblast |           |                |                             | UNC         | Senda virus        | Fibroblasts, NPC, astrocytes | 2   | NA   | 27    | Diabetes II, hypertension, hyperlipidemia             | Ryu et al., 2021                       |
| BC4       | AD9            | 89  | F   | white    | AD        | E34  | Dermal Fibroblast |           | normal, female | Ryu et al., 2021            | UNC         | Senda virus        | Fibroblasts                  | 1   | 14   |       | No serious illness                                    | Sonntag et al., 2017                   |
|           |                |     |     |          |           |      |                   |           |                |                             |             |                    | NPC, astrocytes              | MRI | 3    |       | No serious illness                                    | Ryu et al., 2021                       |

\*HIS: Hachinsky Score

\*\*MOCA: Montreal Cognitive Assessment Test

\*\*\*MMSE: Mini-Mental State Exam

Supplementary Table 1 | Sample list.

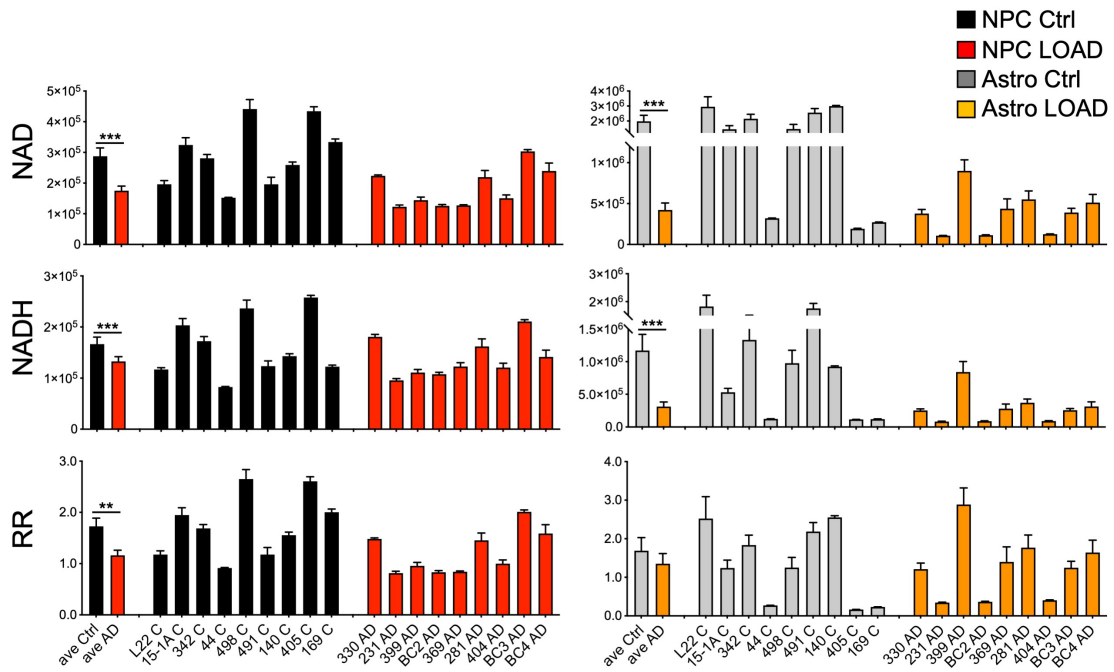

**Supplementary Figure S1 | NAD<sup>+</sup> and NADH production in iPSC-derived NPCs and astrocytes from individual cell lines.** Relative NAD<sup>+</sup> and NADH levels measured as luminescence and RR of LOAD ( $n = 9$ , red bars) or Control ( $n = 9$ , black bars) NPCs, and LOAD ( $n = 9$ , orange bars) or Control ( $n = 9$ , grey bars) astrocytes. Data are means +/- SEM from 2-4 repeat experiments for each cell line. \* $p < 0.1$ ; \*\* $p < 0.05$ ; \*\*\* $p < 0.01$  using one-way ANOVA.

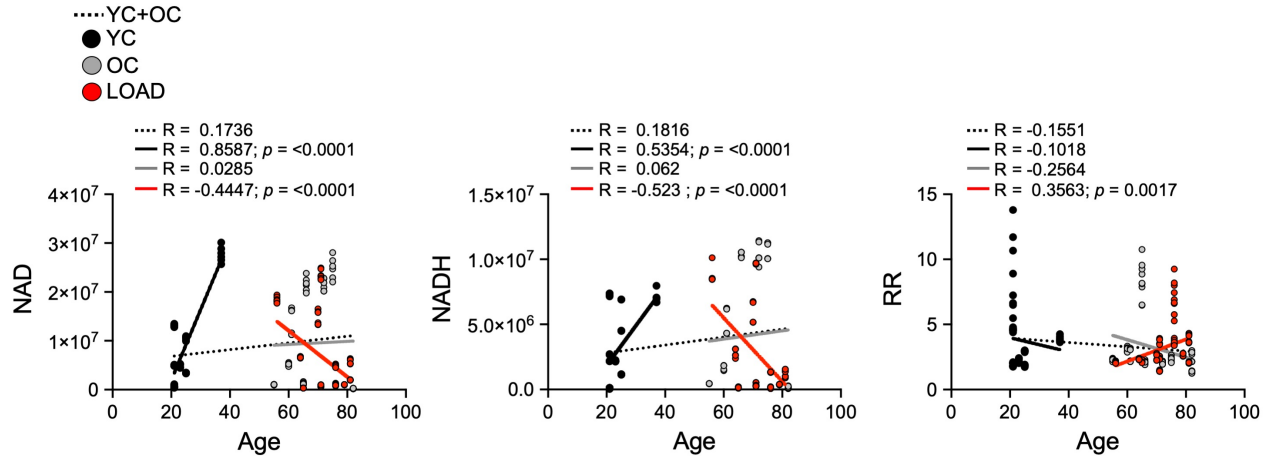

**Supplementary Figure S2 | Correlation of NAD<sup>+</sup>, NADH, and RR with age in fibroblasts.**

Pearson's correlation coefficients of NAD<sup>+</sup> and NADH data from Fig. 3D and RR with age for all Controls (YC+OC, dashed line, ages 21 – 82), YC (black, ages 21 – 37), OC (grey, ages 55 – 82), and LOAD (red, ages 56 – 81). R and *p* values are indicated.
